# Supplementary material for: Defensa del conocimiento: Jñana en el advaita vedanta de Sánkara
Source: Royal Society of Chemistry journal article supplement (doi:10.1039/c0cc04256k), 1996-01-01
Supplement: c0cc04256k.pdf [file c0cc04256k.pdf]

## Supporting information

# Reversible positioning at submicrometer scale of carbon nanotubes mediated by pH-sensitive poly(amino-methacrylate patterns)

Aurore Olivier,<sup>a,c</sup> Franck Meyer,<sup>a</sup> Simon Desbief,<sup>b</sup> Pierre Verge,<sup>a</sup> Jean-Marie Raquez,<sup>a</sup> Roberto Lazzaroni,<sup>b</sup> Pascal Damman,<sup>c\*</sup> Philippe Dubois<sup>a\*</sup>

*a* Laboratory of Polymeric and Composite Materials, Center of Innovation and Research in Materials and Polymers (CIRMAP), University of Mons UMONS, Place du Parc 20, 7000 Mons, Belgium

*b* Laboratory for Chemistry of Novel Materials, CIRMAP, University of Mons UMONS, Place du Parc 20, 7000 Mons, Belgium

*c* InFluX Laboratory, CIRMAP, University of Mons UMONS, Place du Parc 20, 7000 Mons, Belgium

### Contents

### Experimental Section

**Figure S1.** Synthetic pathway of disulfide initiator.

**Figure S2.** XPS spectra of a tethered PDMAEMA brushes on gold surface

**Figure S3.** TM-AFM images of a patterned deposit (lines of a width  $\sim 20 \mu\text{m}$ ) of PDMAEMA ( $100 \times 100 \mu\text{m}^2$ ; height image) and CNTs adsorbed both on the linear PDMAEMA pattern and the uncoated gold surface after deposition performed under acidic conditions (pH 2) ( $35 \times 35 \mu\text{m}^2$ ; phase image)

**Figure S4.** TM-AFM images of a patterned deposit (lines of a width  $\sim 25 \mu\text{m}$ ) of PDMAEMA ( $40 \times 40 \mu\text{m}^2$ ; height image) and residual amount of CNTs on a linear PDMAEMA pattern after deposition performed under alkaline condition (pH 12) ( $31 \times 31 \mu\text{m}^2$ ; phase image).

**Figure S5.** TM-AFM images of PDMAEMA patterns ( $100 \times 100 \mu\text{m}^2$ ; height image) after desanchoring treatment showing the absence of residual CNTs.

## Experimental Section

### Materials

Films of gold with thicknesses of 950 Å were deposited onto silicon substrates by using an electron beam evaporator manufactured by Si-Mat (Silicon Materials). A 100 Å thick layer of titanium was used to promote adhesion between silicon and the film of gold. 11-mercapto-1-undecanol (MUD), undecanethiol, copper(I) bromide (CuBr), ethanol absolute,  $\alpha$ -bromoisobutyryl bromide, 4-dimethylaminopyridine (DMAP), sodium dodecyl sulphate and triethylamine were purchased from Sigma-Aldrich. 2-(*N,N*-dimethylamino)ethyl methacrylate (DMAEMA) was purchased from VWR and filtered through aluminum oxide before use. Methanol was purchased from Acros Organics and filtered through aluminum oxide before use. 2,2-dipyridyl (Bpy) was purchased from Acros Organics. Multiwall carbon nanotubes (thick MWCNTs purified) were supplied by Nanocyl (Belgium). Sonication was performed with a 2210E-MTH BRANDSONIC apparatus.

### Atomic Force Microscopy (AFM) analysis

AFM measurements were performed in “tapping-mode” (TM-AFM). The cantilever holding the probe tip oscillates close to the resonance frequency (ca. 300 kHz) above the sample surface so that the tip is in intermittent contact with the surface at the lower end of the oscillation. Simultaneous recording of the phase and the height images provides a map of the local mechanical response. All TM-AFM images were recorded with a Nanoscope V microscope operated at room temperature in air using commercial cantilevers made of silicon with a spring constant of 30 N/m (Veeco). 512x512 pixels images were recorded, and the Nanoscope image processing software was used for image analysis. Unless otherwise stated, image treatment was limited to a “flattening” operation, whereby a first-order surface representing height variations related to a possible tilt of the sample is subtracted from the original image.

Conductive-AFM (C-AFM) measurements were performed under ambient conditions, in contact mode, using the Nanoscope V controller with an extended TUNA module. Si etched probes with Pt/Ir coating (PPPcontPt; Nanosensor) with a spring constant of 0.2 N/m were used. Conducting silver paint was applied on the side of the sample to make electrical connection. The applied voltage was set to 500 mV and the sensitivity to 100 nA/V.

### X-Ray Photoelectron Spectroscopy analysis

All reported spectra were recorded at a 90° take-off angle relative to the substrate with a VG ESCALAB 220iXL spectrometer using the monochromatised Al K $\alpha$  radiation (1486.6 eV).

### Synthesis of ATRP initiator

#### Bis(11-hydroxyundecyl)disulfide **1**<sup>1</sup>

An iodine solution (2.5 g, 10 mmol, in 20 ml of ethanol) is added dropwise to a stirring solution of 11-mercapto-1-undecanol (3.11 g, 15.25 mmol) in 40 ml of ethanol. After addition of the iodine solution, the white crude material is filtered off and washed with ethanol. Then, the residue is recrystallized from ethanol to give the compound **1** in 98% yield.

### **11,11'-disulfanediylbis(undecane-11,1-diyl) bis(2-bromo-2-methylpropanoate) 2**

**1** (0.7g, 1.72 mmol) and triethylamine (0.57ml, 4.13 mmol) are stirred at 0°C in 10 ml of dichloromethane.  $\alpha$ -Bromoisobutyryl bromide (0.51 ml, 4.13 mmol) is added dropwise followed by DMAP (42 mg, 0.34 mmol) and the mixture is stirred at 40°C for 24 h. Then, the reaction is hydrolyzed with water; the organic layer is washed two times with water and dried over Na<sub>2</sub>SO<sub>4</sub>. After evaporation of the solvent, the compound **1** is recovered in pure form without further purification in 95% yield.

<sup>1</sup>H NMR (300MHz, CDCl<sub>3</sub>)  $\delta$ : 4.17 (t, 4H, CH<sub>2</sub>-O), 2.68 (t, 4H, CH<sub>2</sub>-S), 1.95 (m, 12H, CH<sub>3</sub>) and 1.12-1.79 (m, 36H, CH<sub>2</sub>).

### **Procedure for patterning of gold surface**

Some drops of an ethanol solution of **2** (C= 5mM) are spread onto a PDMS stamp. After 5 min, the stamp is dried by a flow of nitrogen and put in contact with the substrate for 30 s.

### **Typical procedure for surface-initiated polymerization of DMAEMA**

A first flask containing 280 mg (2 mmol) of CuBr and 620 mg of Bpy (4 mmol) were submitted to three-time series of evacuation/nitrogen. In a second flask, 15 ml of methanol/water (1:1) was degassed with nitrogen during 15 min and transferred in the first flask containing the catalyst/ligand complex. In a third flask, a mixture of 16.8 ml (0.1 mol) of DMAEMA and 15 ml of methanol/water (1:1), were also degassed with nitrogen. The solution was then transferred to the reactor containing the surface-attached initiator, followed by the transferred of the catalyst/ligand solution. After 1 h, at room temperature, the sample is washed and sonicated, few minutes, in methanol to remove the non-grafted polymer.

### **Passivation of gold substrate**

The substrate, after polymerization of DMAEMA, is immersed in a 2mM ethanol solution of undecanethiol (V = 10 ml) at room temperature for 1h. Then, the surface is washed, sonicated for 1 min in ethanol and dried under a flow of nitrogen.

### **Typical procedure for the preparation of nanotubes assembly on PDMAEMA patterns**

1 mg of CNTs is stirred in 15 ml of water for 10 min. The solution was adjusted at pH 12 by addition of saturated sodium carbonate; acidification (pH 2) was carried out with concentrated HCl. The PDMAEMA patterned substrate is immersed in the stirring solution overnight. Then, the samples were washed and sonicated for 30 s in neutral water.

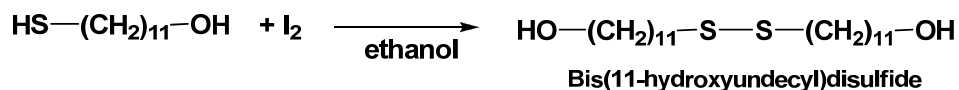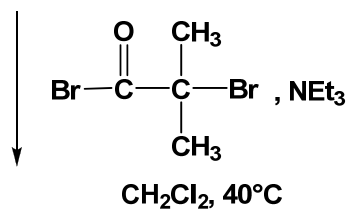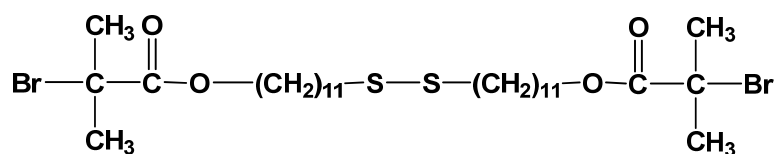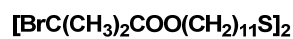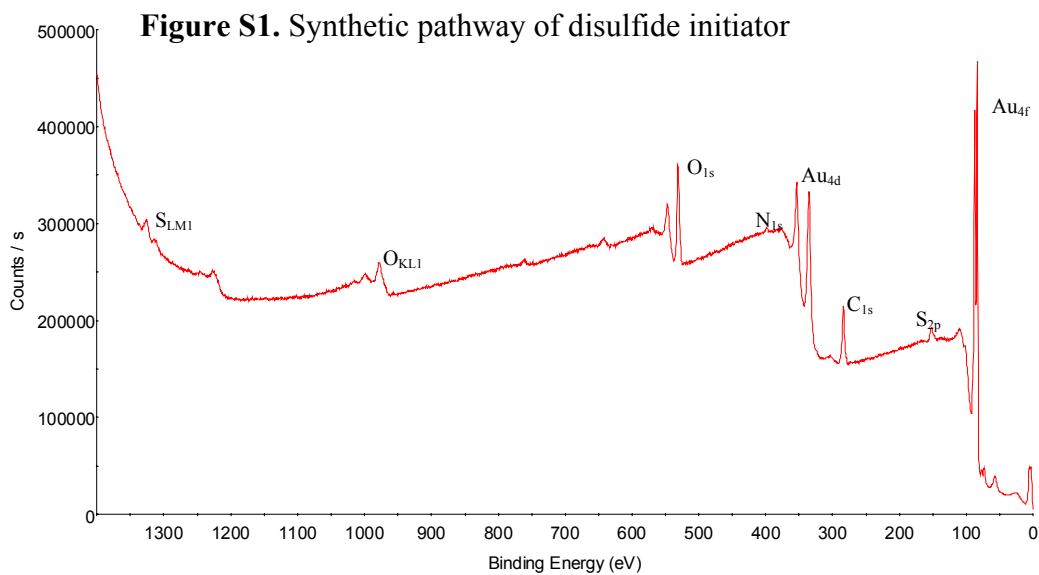

**Figure S2. XPS spectra of a tethered PDMAEMA brushes on gold surface**

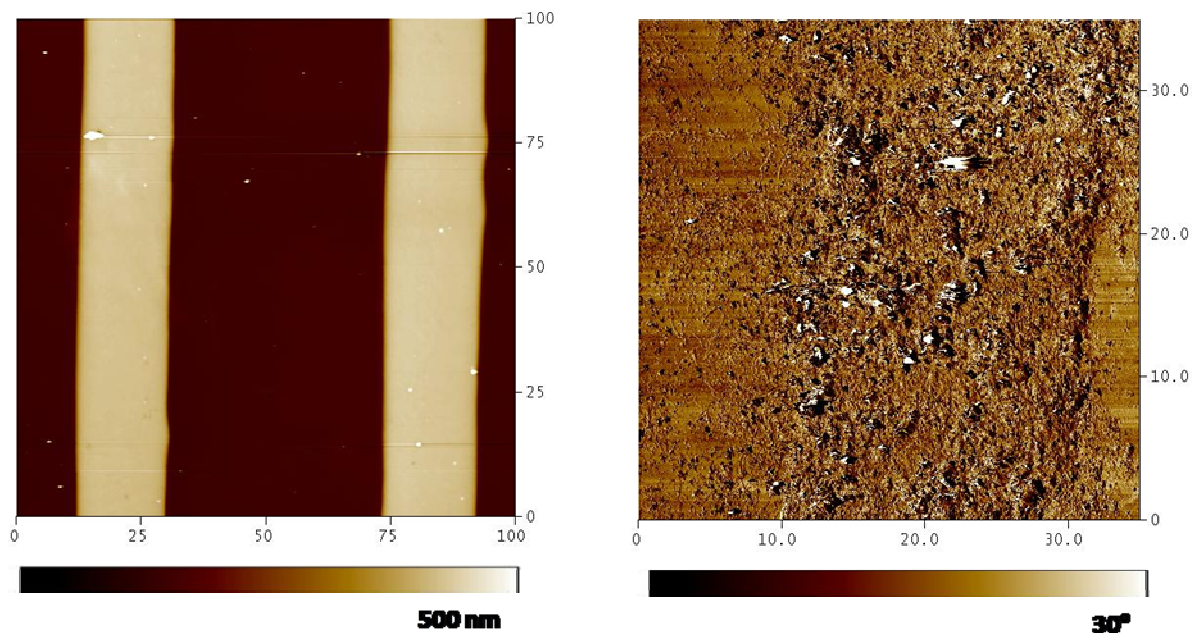

**Figure S3.** TM-AFM images of a patterned deposit (lines of a width  $\sim 20 \mu\text{m}$ ) of PDMAEMA ( $100 \times 100 \mu\text{m}^2$ ; height image) and CNTs adsorbed both on the linear PDMAEMA pattern and the uncoated gold surface after deposition performed under acidic conditions (pH 2) ( $35 \times 35 \mu\text{m}^2$ ; phase image)

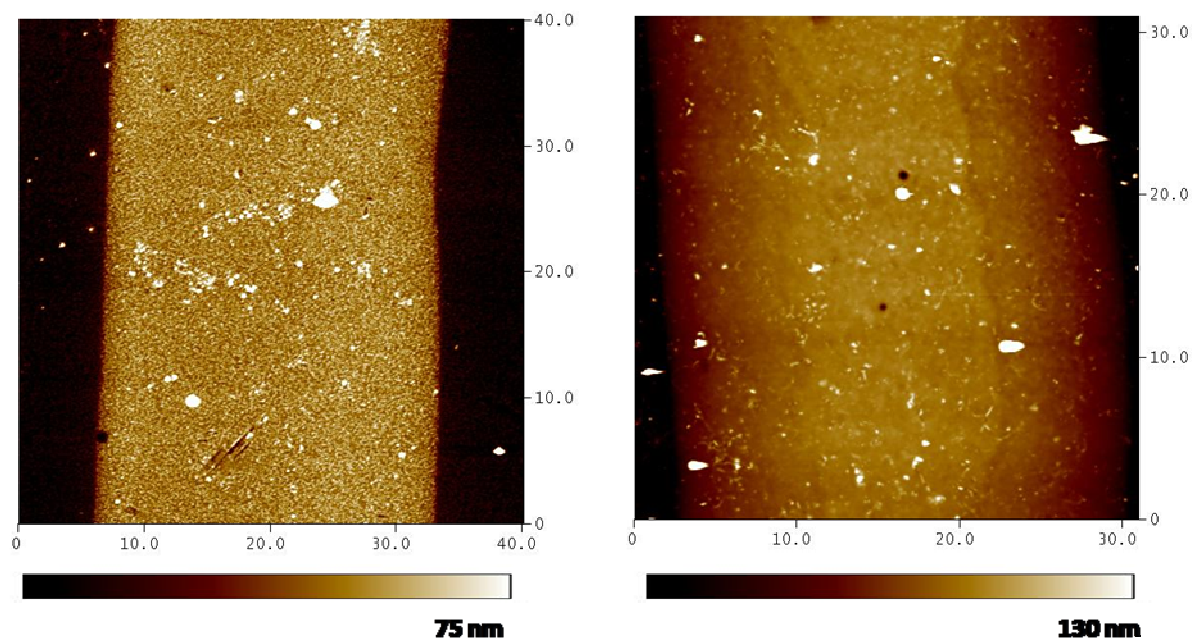

**Figure S4.** TM-AFM images of a patterned deposit (lines of a width  $\sim 25 \mu\text{m}$ ) of PDMAEMA ( $40 \times 40 \mu\text{m}^2$ ; height image) and residual amount of CNTs on a linear PDMAEMA pattern after deposition performed under alkaline conditions (pH 12) ( $31 \times 31 \mu\text{m}^2$ ; height image).

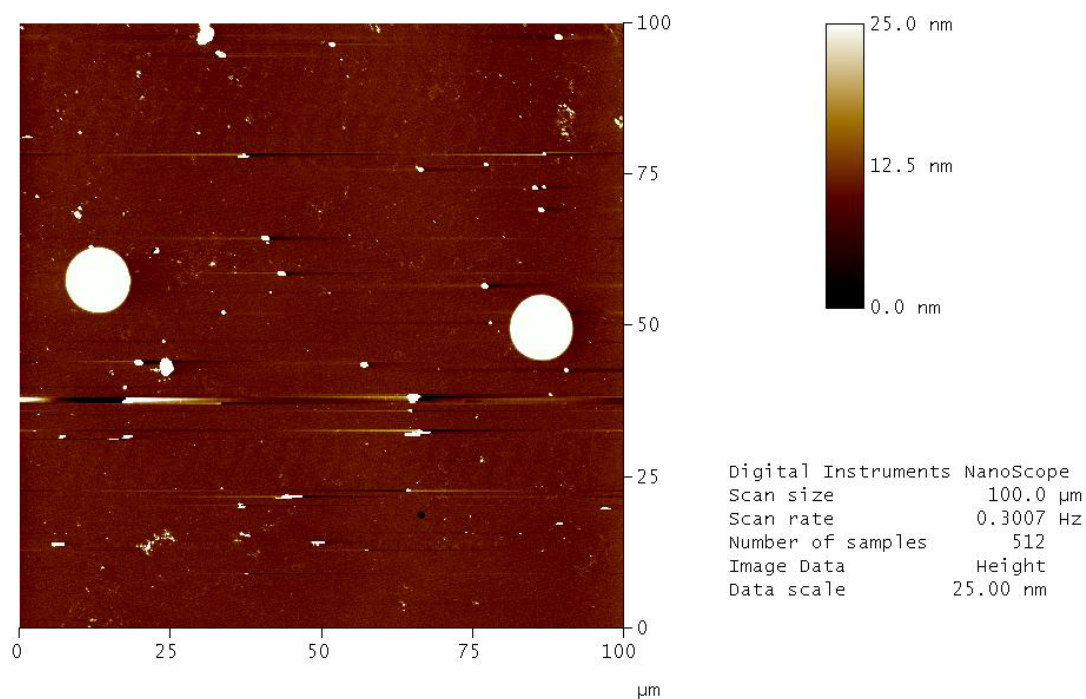

b46d-16-09-09-ft.001

**Figure S5.** TM-AFM images of PDMAEMA patterns ( $100 \times 100 \mu\text{m}^2$ ; height image) after desanchoring treatment showing the absence of residual CNTs

## Reference

1. Chung, Y. C.; Chiu, Y. H.; Wu, Y. W.; Tao Y. T. *Biomaterials*, **2005**, *26*, 2313.
